# Supplementary material for: Synergistic effects of Lewis acid–base and Coulombic interactions for high-performance Zn–I2 batteries
Source: Royal Society of Chemistry journal article supplement (doi:10.1039/d3ee03297c), 2023-11-16
Supplement: d3ee03297c1.pdf [file d3ee03297c1.pdf]

## Supporting Information

# Synergistic Effect of Lewis Acid-Base and Coulombic Interactions for High-performance Zn-I<sub>2</sub> Batteries

Jiafeng He,<sup>a,b,†</sup> Yongbiao Mu,<sup>a,b,†</sup> Buke Wu,<sup>a,b</sup> Fuhai Wu,<sup>a,b</sup> Ruixi Liao,<sup>a,b</sup> Hongfei Li,<sup>c</sup> Tianshou Zhao,<sup>a,b\*</sup> and Lin Zeng<sup>a,b\*</sup>

<sup>a</sup> Shenzhen Key Laboratory of Advanced Energy Storage, Southern University of Science and Technology, Shenzhen 518055, P. R. China

<sup>b</sup> Department of Mechanical and Energy Engineering, Southern University of Science and Technology, Shenzhen 518055, P. R. China

<sup>c</sup> School of System Design and Intelligent Manufacturing, Southern University of Science and Technology, Shenzhen, 518055, P. R. China

\*E-mail: [zhaots@sustech.edu.cn](mailto:zhaots@sustech.edu.cn); [zengl3@sustech.edu.cn](mailto:zengl3@sustech.edu.cn)

## Experimental section

**Preparation of ZIF-90.** In a typical synthesis, a solid mixture of 0.296 g (1.00 mmol) zinc nitrate hexahydrate, 0.384 g (4.00 mmol) imidazole-2-formaldehyde, and 0.068 g (1.00 mmol) sodium formate was dissolved in 40 mL methanol by ultrasonic treatment. The as-prepared solution was placed in a Teflon-lined stainless steel autoclave, and heated at 85 °C in an air-circulating oven for 24 h. After solvothermal reaction and cooling to 20 °C, the ZIF-90 crystals were filtered and washed with methanol three times and then dried in air for 24 h at room temperature.

**Preparation of IL-ZIF-90.** To synthesize IL-ZIF-90 crystals, 0.35 g of dried ZIF-90 crystals and 1 g 1-aminopyridinium iodide (AmPyI) were suspended in 25 mL methanol and refluxed for 24 h at 50 °C. The reaction mixture was filtered, and the solid was washed with fresh methanol 2–3 times. The solid was further exchanged with fresh methanol for 24 h at 50 °C. The solid was dried for 24 h at 85 °C.

**Preparation of IL-ZIF-90-I<sup>-</sup>.** First, the as-contained IL-ZIF-90 was mixed with Ketjen black and polyvinylidene fluoride binder in N-Methylpyrrolidone (NMP, Aladdin, AR) solvent on a mass ratio of 7:2:1, followed by vigorously stirring for 4 h. The slurry was then coated with the graphite paper substrate and dried at 60 °C for 12 h to obtain a pristine IL-ZIF-90 electrode. After that, the electrode was immersed directly in 1 M ZnI<sub>2</sub> solution away from light for 12 h. Subsequently, the excess ZnI<sub>2</sub> solution was removed by dust-free paper and dried at 50 °C under vacuum conditions for 12 h, protected from light, and finally, the IL-ZIF-90-I<sup>-</sup> electrode was obtained. The ZIF-90-I<sup>-</sup> electrode was prepared via the same procedure. The mass loading of I<sup>-</sup> was around 2.0-2.5 mg cm<sup>-2</sup> for IL-ZIF-90-I<sup>-</sup> electrode, while the mass loading of I<sup>-</sup> in ZIF-90-I<sup>-</sup> electrode was 1.5-2.2 mg cm<sup>-2</sup>.

## Materials Characterization

The morphologies were characterized by Hitachi SU-8230 field emission scanning electron microscopy (FESEM, Hitachi SU-8230). Transmission electron microscopy (TEM), energy-dispersive X-ray analysis (EDX), and elemental mapping were

performed using a Talos instrument with an acceleration voltage of 300 kV. X-ray diffraction (XRD, Bruker Advance D8, Ultima IV with D/teX Ultra with Cu-K $\alpha$  radiation) was employed to characterize the crystalline structures of samples with a scanning rate of 10° min<sup>-1</sup>. X-ray photoelectron spectra (XPS, Escalab 250Xi) were acquired on a Thermo SCIENTIFIC ESCALAB 250Xi with Al K $\alpha$  (h $\nu$  = 1486.8 eV) as the excitation source. UV-vis absorption spectra were collected by measuring the reacted electrolyte, which was obtained by dipping the electrode films and separators at different voltage states into the corresponding electrolytes, using a Lambda 365 UV-vis spectrophotometer (PerkinElmer) while employing the ZnSO<sub>4</sub> electrolyte as the reference. The specific surface area measurement was tested by a Specific surface and aperture analyzer (Micromeritics ASAP 2460). Fourier transformed Infrared (FTIR) spectroscopy was conducted on a Bruker VERTEX 70 & ALPHA spectrometer. To study the thermal stability of iodine, thermogravimetric was measured from 50 to 700 °C under an N<sub>2</sub> atmosphere with a heating rate of 10 °C min<sup>-1</sup>, using a thermogravimetric analyzer (Discovery TGA).

### **Electrochemical measurements**

CR2032 coin-type battery was assembled in the open-air environment using the as-above synthesized electrode as a cathode, glass fiber as the separator, 1 M ZnSO<sub>4</sub> solution as the aqueous electrolyte, and a zinc metal plate as the anode for electrochemical measurements. The electrochemical workstation (CHI 760D) was employed to record the cyclic voltammetry (CV) profiles and electrochemical impedance spectroscopy (EIS). Galvanostatic charge-discharge tests between 0.6 and 1.8 V versus Zn<sup>2+</sup>/ Zn were performed on the LAND battery testing system and NETWARE battery analyzer.

### **Density functional theory calculation**

All the density functional theory (DFT) calculations were carried out in the DMol3 package of Materials Studio 2018. The exchange-correlation potential was treated by using a generalized gradient approximation (GGA) with the Perdew-Burke-

Ernzerhof (PBE) parametrization.<sup>[1,2]</sup> A cutoff energy of 450 eV was set. The electronic energy was considered self-consistent when the energy change was smaller than  $10^{-5}$  eV, while the tolerance convergence in ionic was also  $10^{-5}$  eV. Furthermore, the van der Waals correction of Grimme's DFT-D3 model was adopted.<sup>[3-5]</sup> The different charge densities can be defined as  $\Delta\rho = \rho^*(\text{I}^-/\text{I}_2/\text{I}_3^-) - \rho^* - \rho(\text{I}^-/\text{I}_2/\text{I}_3^-)$ , where  $\rho^*(\text{I}^-/\text{I}_2/\text{I}_3^-)$ ,  $\rho^*$ , and  $\rho(\text{I}^-/\text{I}_2/\text{I}_3^-)$  are the electron densities of the IF-ZIF-90 with the adsorbed  $\text{I}^-/\text{I}_2/\text{I}_3^-$  molecule, the IF-ZIF-90, and isolated  $\text{I}^-/\text{I}_2/\text{I}_3^-$  molecule, respectively. The adsorption energy  $E_{\text{ads}}$  per  $\text{I}^-/\text{I}_2/\text{I}_3^-$  molecule can be defined as,  $E_{\text{ads}} = E^*(\text{I}^-/\text{I}_2/\text{I}_3^-) - E^* - E(\text{I}^-/\text{I}_2/\text{I}_3^-)$ , where  $E^*(\text{I}^-/\text{I}_2/\text{I}_3^-)$  stands for the energy of the IF-ZIF-90 with the adsorbed  $\text{I}^-/\text{I}_2/\text{I}_3^-$  molecule,  $E^*$  is the energy of IF-ZIF-90, and  $E(\text{I}^-/\text{I}_2/\text{I}_3^-)$  is the energy of an  $\text{I}^-/\text{I}_2/\text{I}_3^-$  molecule under vacuum.

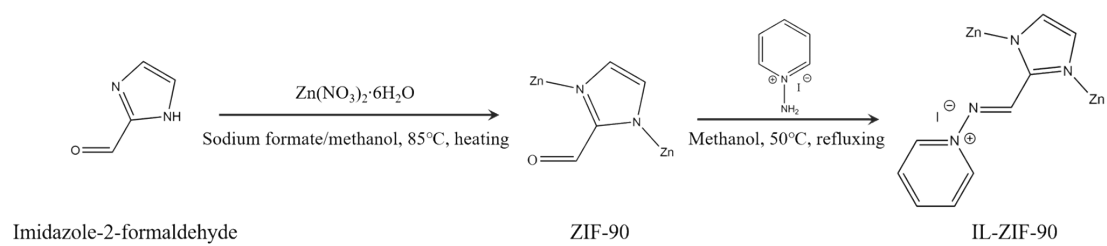

**Figure S1.** Synthesis routine of IL-ZIF-90.

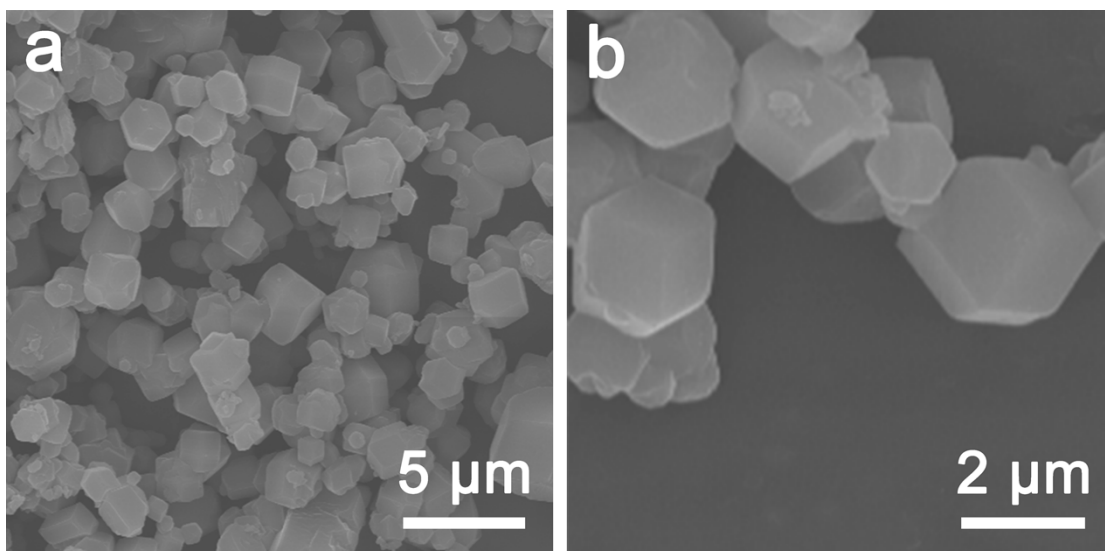

**Figure S2.** (a, b) FESEM images of ZIF-90 at different magnifications.

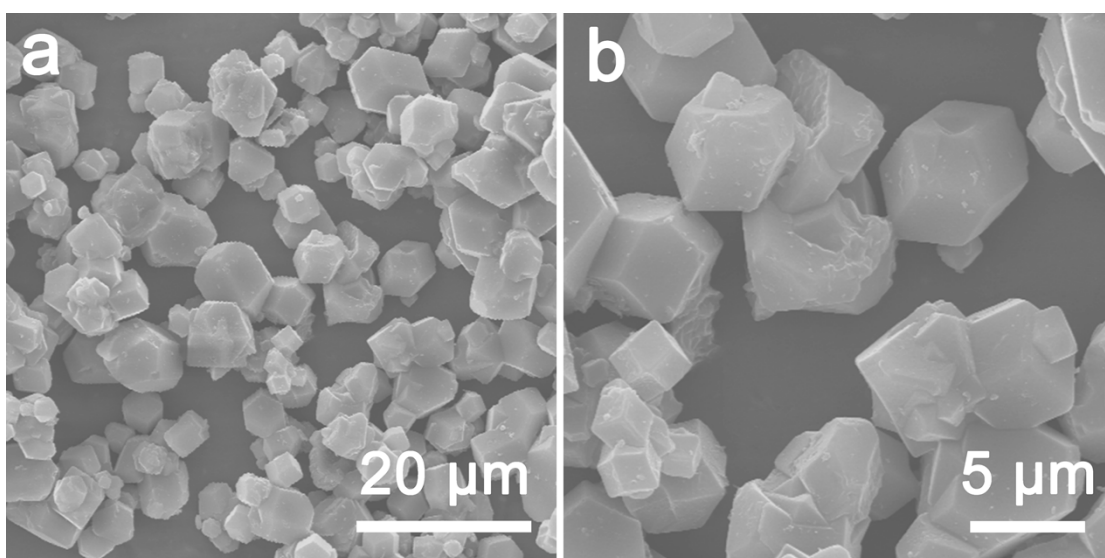

**Figure S3.** (a, b) FESEM images of IL-ZIF-90 at different magnifications.

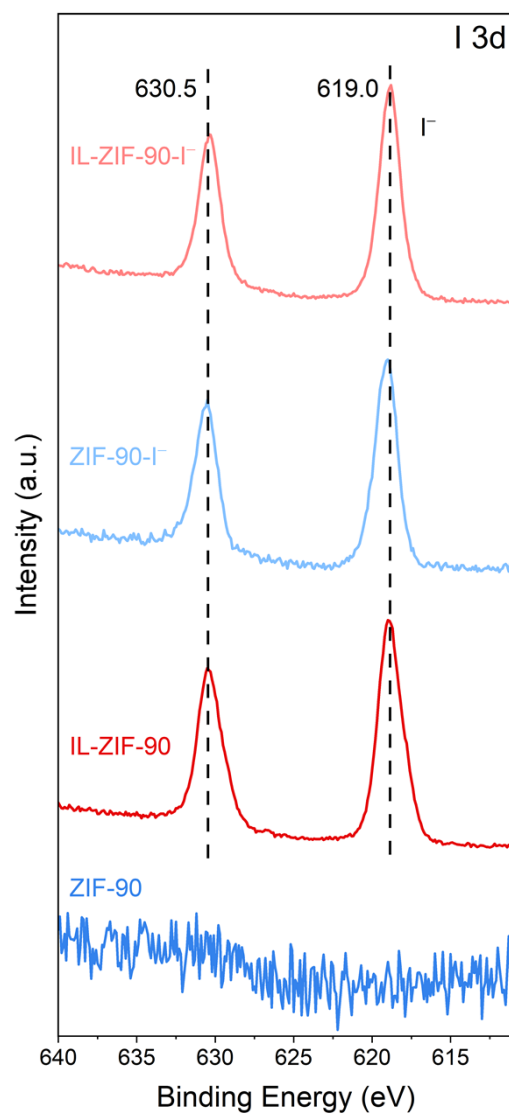

**Figure S4.** High-resolution XPS spectra of I 3d for ZIF-90, IL-ZIF-90, ZIF-90-I<sup>-</sup> and IL-ZIF-90-I<sup>-</sup>.



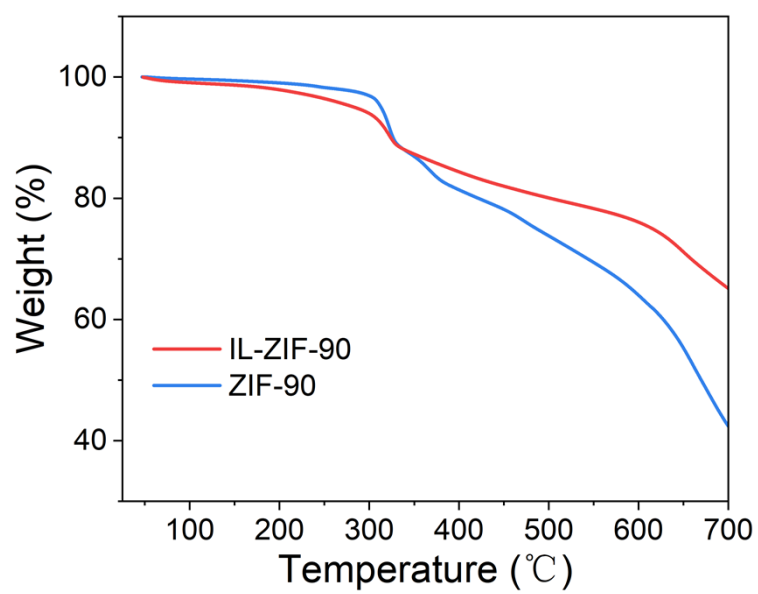

**Figure S5.** TGA curves of ZIF-90 and IL-ZIF-90

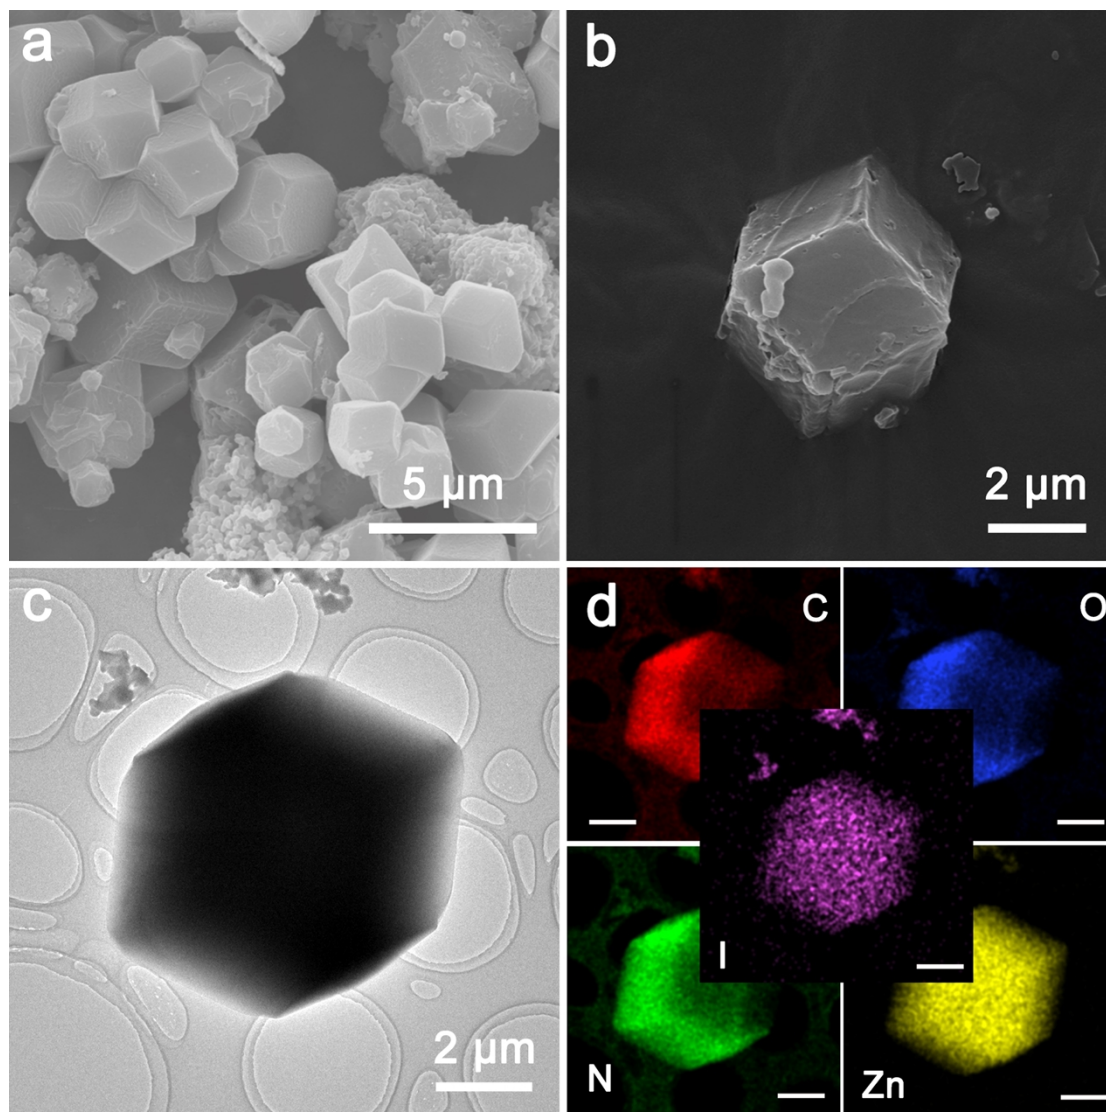

**Figure S6.** (a, b) FESEM images of ZIF-90-I<sup>-</sup> at different magnifications. (c) TEM image of ZIF-90-I<sup>-</sup>, and (d) corresponding EDS elemental mappings of C, O, N, Zn, and I.

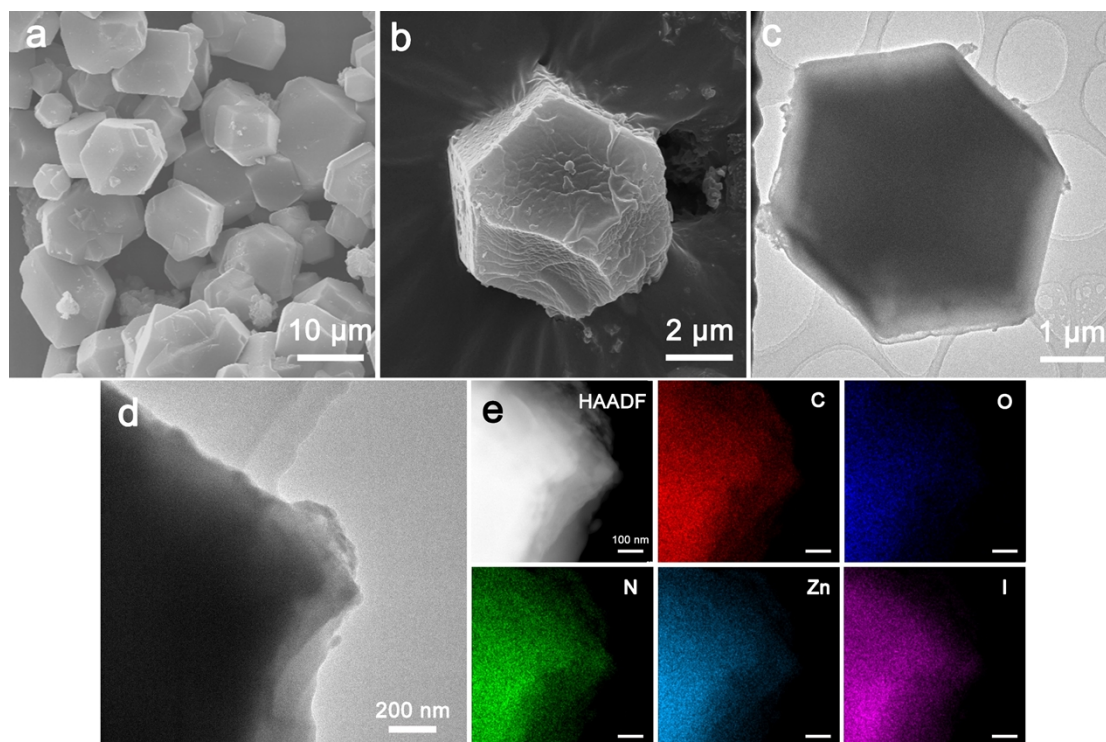

**Figure S7.** (a, b) FESEM images of IL-ZIF-90-I<sup>-</sup> at different magnifications. (c) TEM and (d) HRTEM images of IL-ZIF-90-I<sup>-</sup>. (e) HAADF-STEM image and corresponding EDS elemental mappings of C, O, N, Zn, and I.

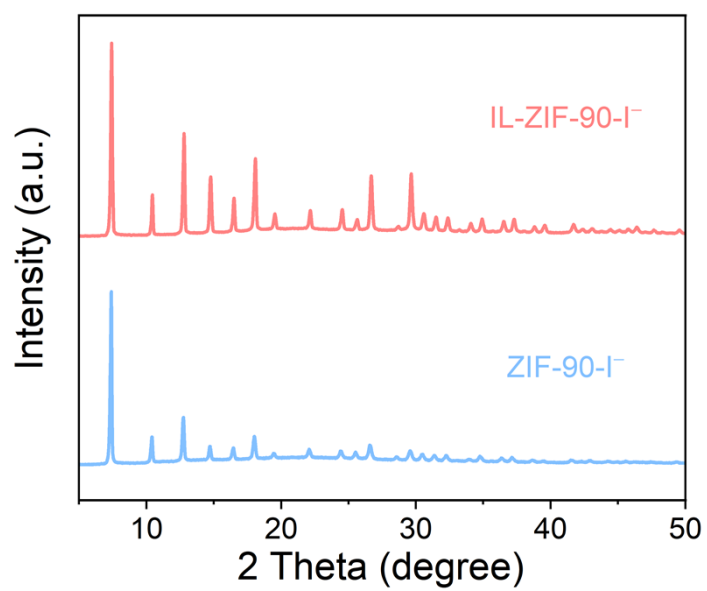

**Figure S8.** XRD patterns of ZIF-90-I<sup>-</sup> and IL-ZIF-90-I<sup>-</sup>.

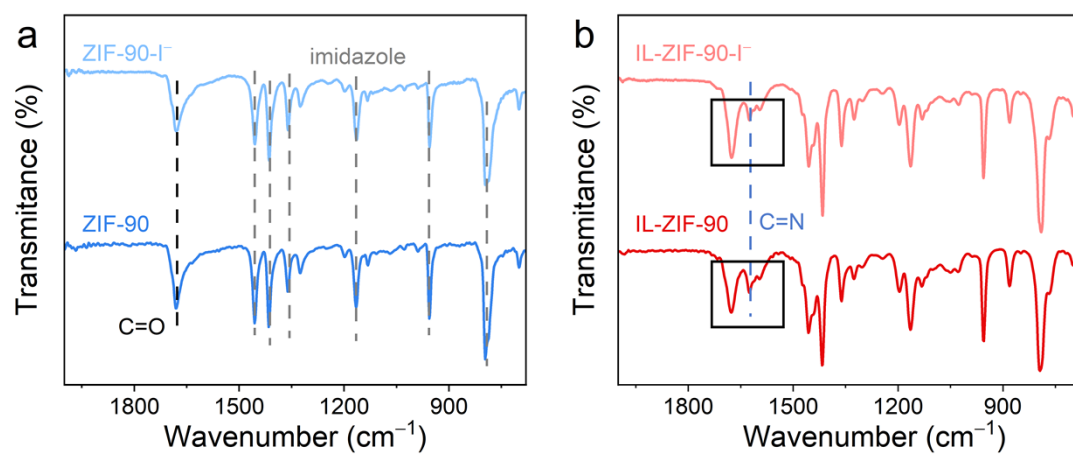

**Figure S9.** FTIR spectra of (a) ZIF-90 and (b) IL-ZIF-90 before and after adsorbing iodine.

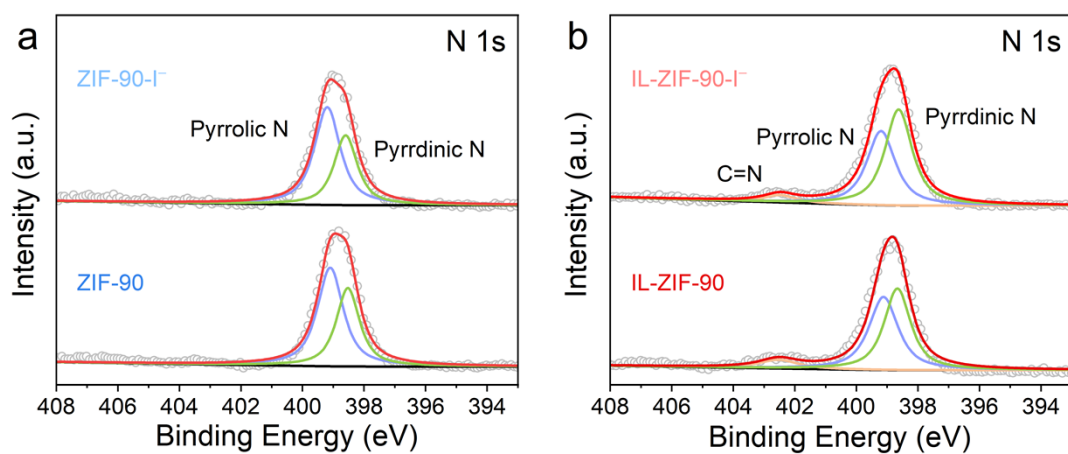

**Figure S10.** High-resolution XPS spectra of N 1s for (a) ZIF-90 and (b) IL-ZIF-90 before and after adsorbing iodine.

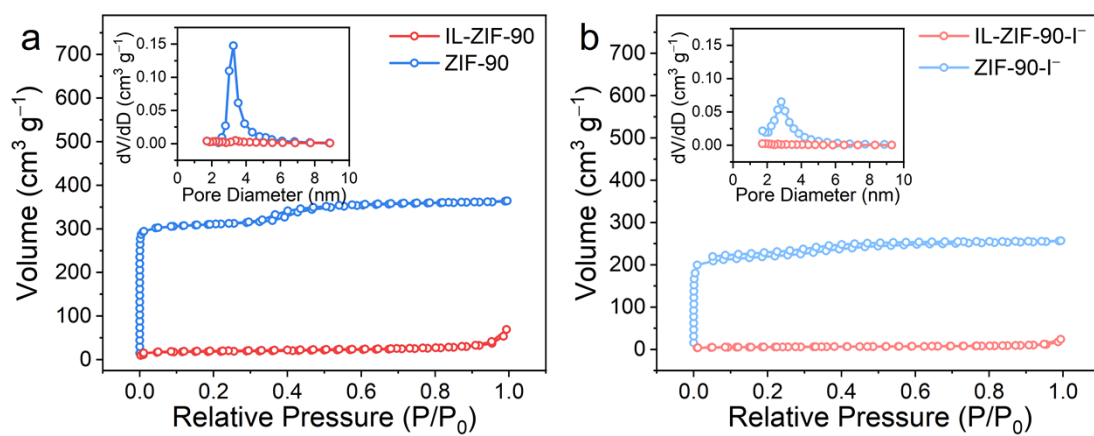

**Figure S11.** N<sub>2</sub> adsorption–desorption isotherms (inset shows corresponding micropore distributions) of ZIF-90 and IL-ZIF-90 (a) before and (b) after adsorbing iodine.

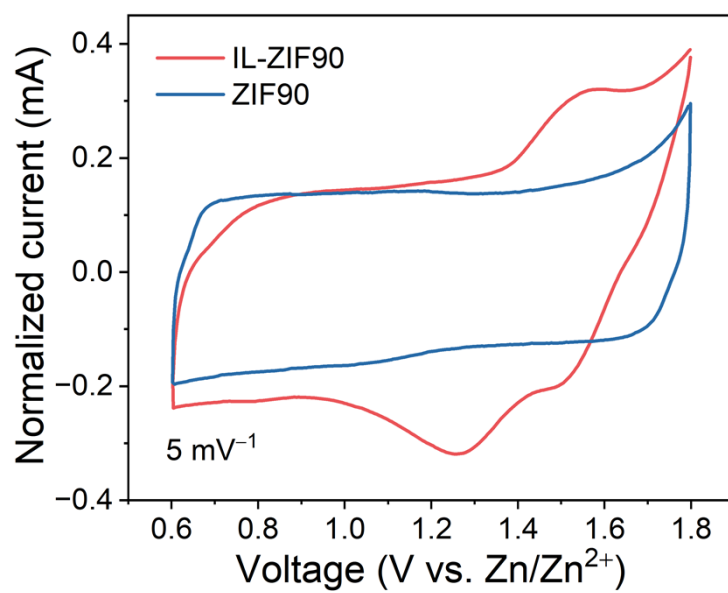

**Figure S12.** CV curves of ZIF-90 and IL-ZIF-90 electrodes at a scan rate of 5 mV s<sup>-1</sup>.



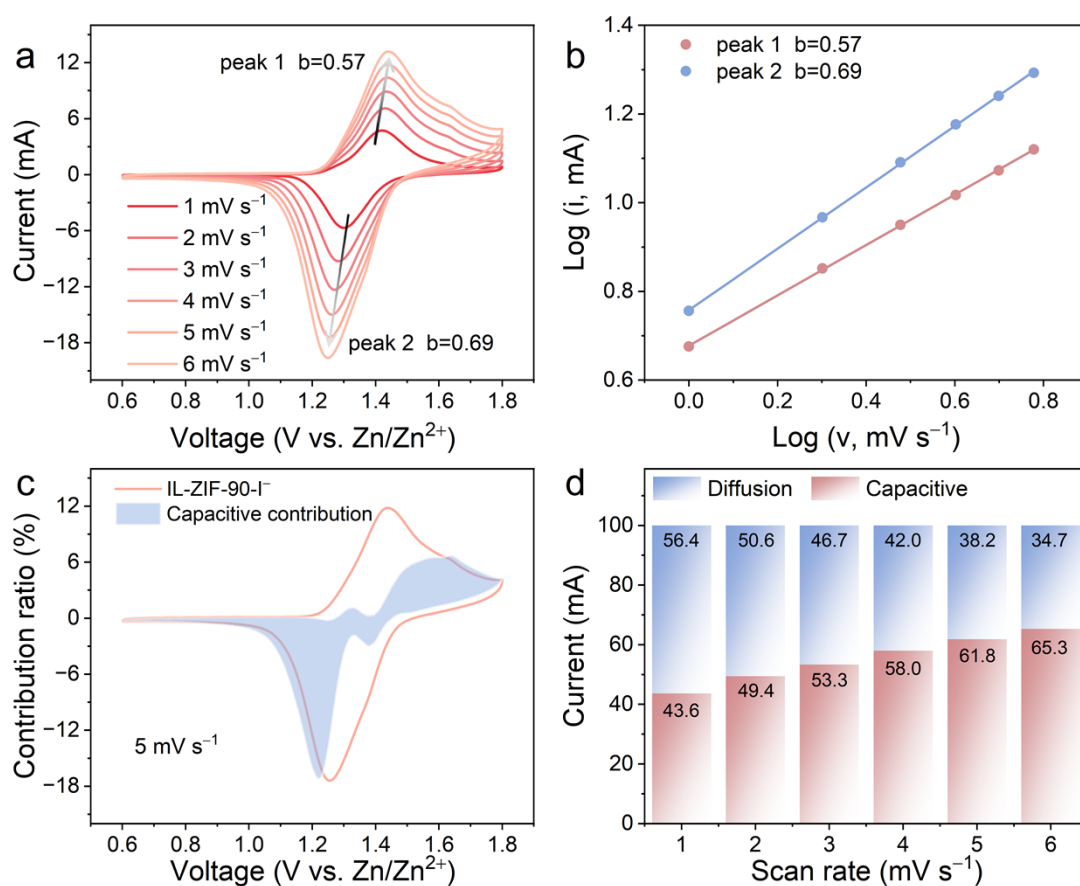

**Figure S13.** The reaction kinetics of IL-ZIF-90-I<sup>-</sup> cathode. (a) CV curves at different scan rates. (b) Log (*i*) vs. log (*v*) plots of the cathodic and anodic current responses at peaks shown in the CV curves. (c) The illustration of the calculated capacitive and diffusion-controlled contributions of IL-ZIF-90-I<sup>-</sup> cathode at 5 mV s<sup>-1</sup>. (d) Contribution ratio of the capacitive- and diffusion-controlled process of IL-ZIF-90-I<sup>-</sup> cathode at various scan rates.

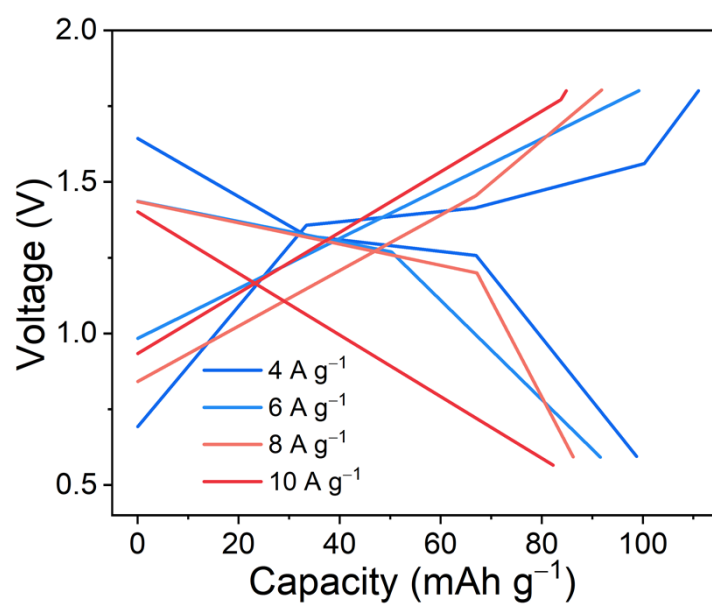

**Figure S14.** GCD curves of ZIF-90-I<sup>-</sup> electrode at various rates.

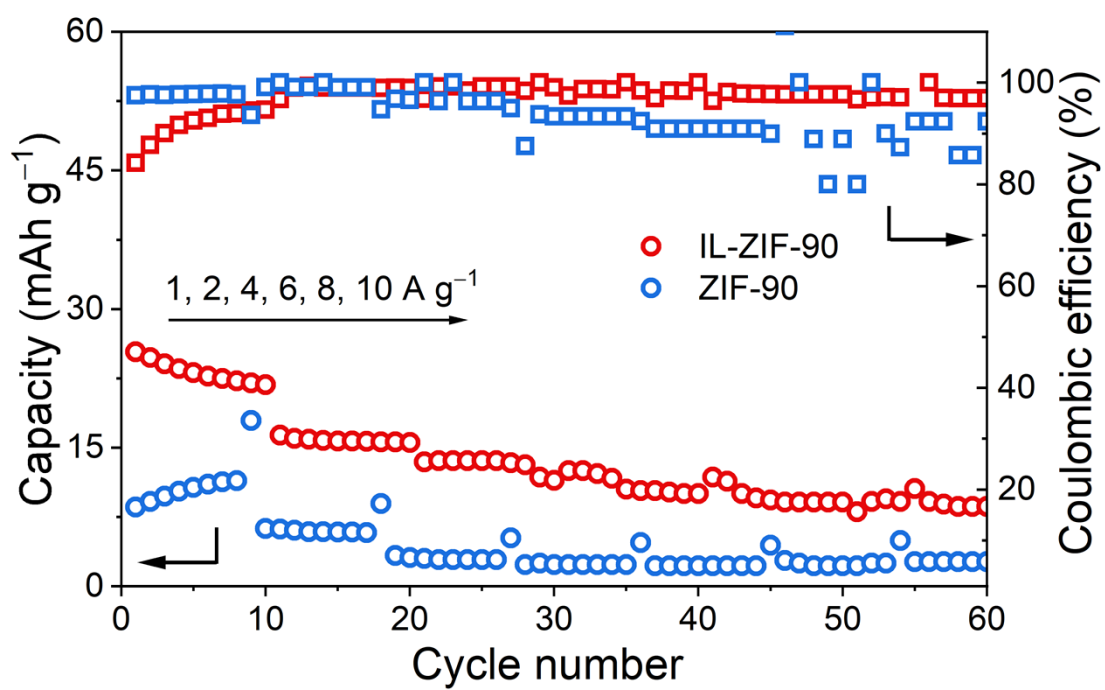

**Figure S15.** The rate capability of ZIF-90 and IL-ZIF-90 electrodes.

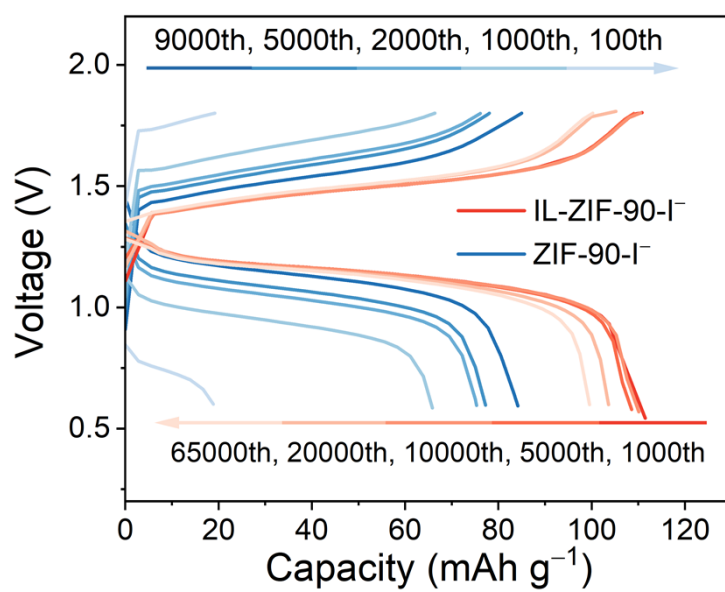

**Figure S16.** GCD curves of ZIF-90-I<sup>-</sup> and IL-ZIF-90-I<sup>-</sup> electrodes at 10 A g<sup>-1</sup>.

**Table S1.** The cell performance comparison of zinc-iodine cells.

| <b>Materials</b>                                                          | <b>Cycle number</b> | <b>Current density (A g<sup>-1</sup>)</b> | <b>Capacity retention (%)</b> | <b>Ref.</b> |
|---------------------------------------------------------------------------|---------------------|-------------------------------------------|-------------------------------|-------------|
| Zn-BTC membrane                                                           | 6000                | 1.92                                      | 84.6                          | 1           |
| I <sub>2</sub> -Nb <sub>2</sub> CT <sub>x</sub> MXene electrode           | 23000               | 6                                         | 80                            | 2           |
| SC-PPS@Zn                                                                 | 6000                | 3.2                                       | 90.2                          | 3           |
| Zeolite-Zn                                                                | 5600                | 2                                         | 91.9                          | 4           |
| Zn-TCPP                                                                   | 5000                | 5                                         | 68.4                          | 5           |
| Co[Co <sub>1/4</sub> Fe <sub>3/4</sub> (CN) <sub>6</sub> ]/I <sub>2</sub> | 2000                | 4                                         | 80.2                          | 6           |
| Zn@ZSO                                                                    | 10000               | 2                                         | 66.7                          | 7           |
| ODAI <sub>2</sub>                                                         | 10000               | 4.5                                       | 80                            | 8           |
| IL-ZIF-90-I <sup>-</sup>                                                  | 65000               | 10                                        | 91.7                          | This work   |

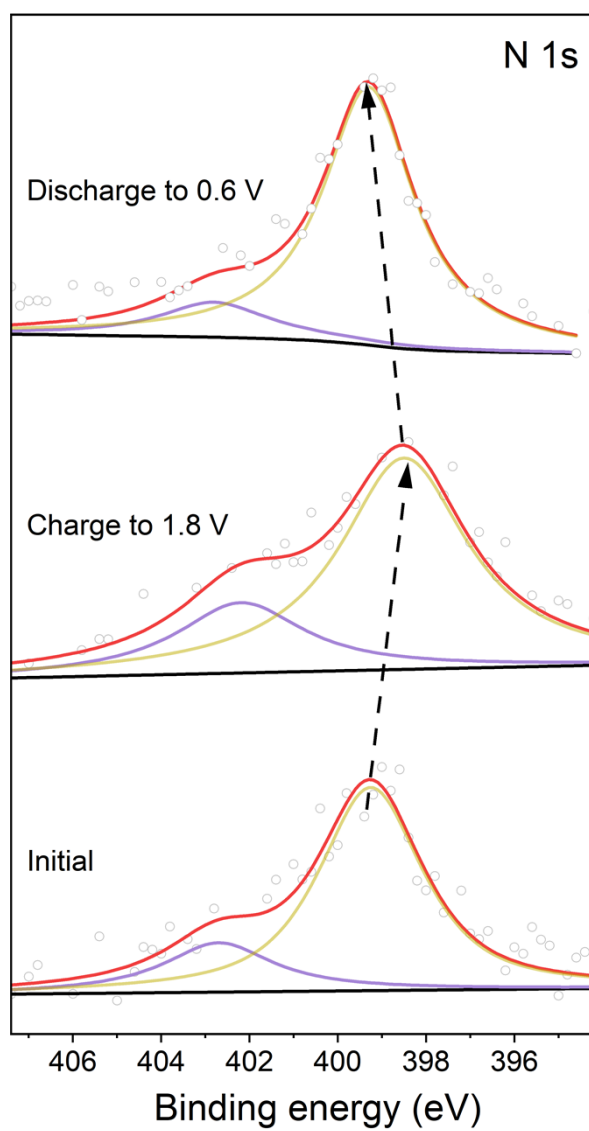

**Figure S17.** High-resolution XPS spectra of N 1s for IL-ZIF-90-I<sup>-</sup> electrode at various states.

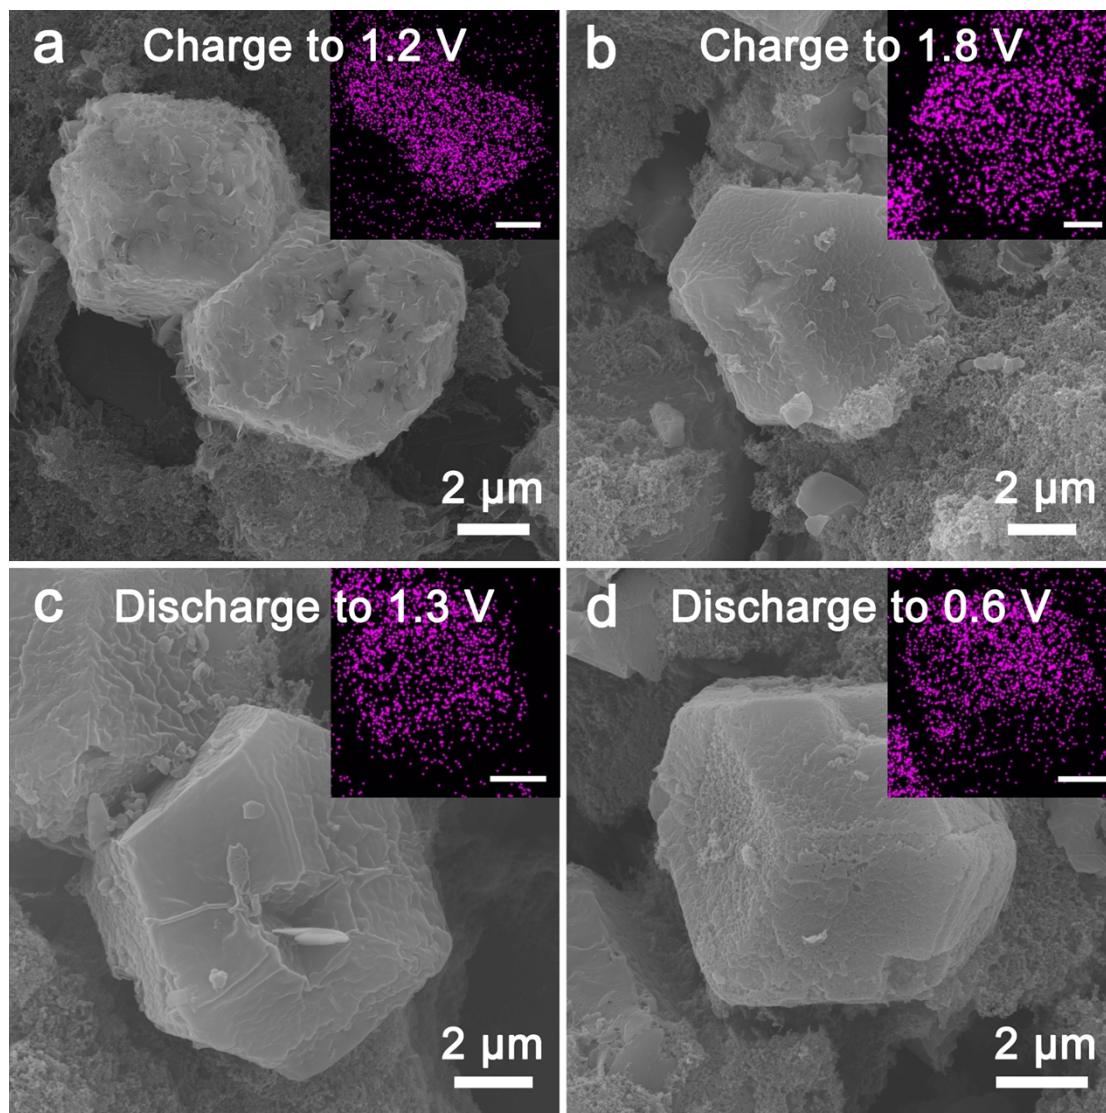

**Figure S18.** SEM images with the iodine element mapping of IL-ZIF-90-I<sup>-</sup> cathodes at different electrochemical states: (a) charge to 1.2 V, (b) charge to 1.8 V, (c) discharge to 1.3 V, (d) discharge to 0.6 V.

### A-site N adsorb iodine species

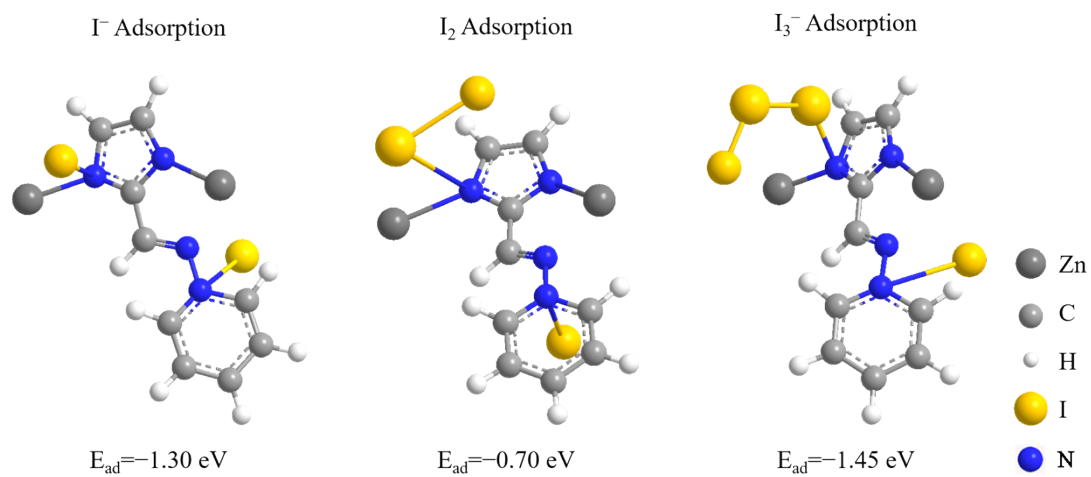

**Figure S19.** The proposed adsorption model of A-site N for iodine species and calculated adsorption energies.



### B-site N adsorb iodine species

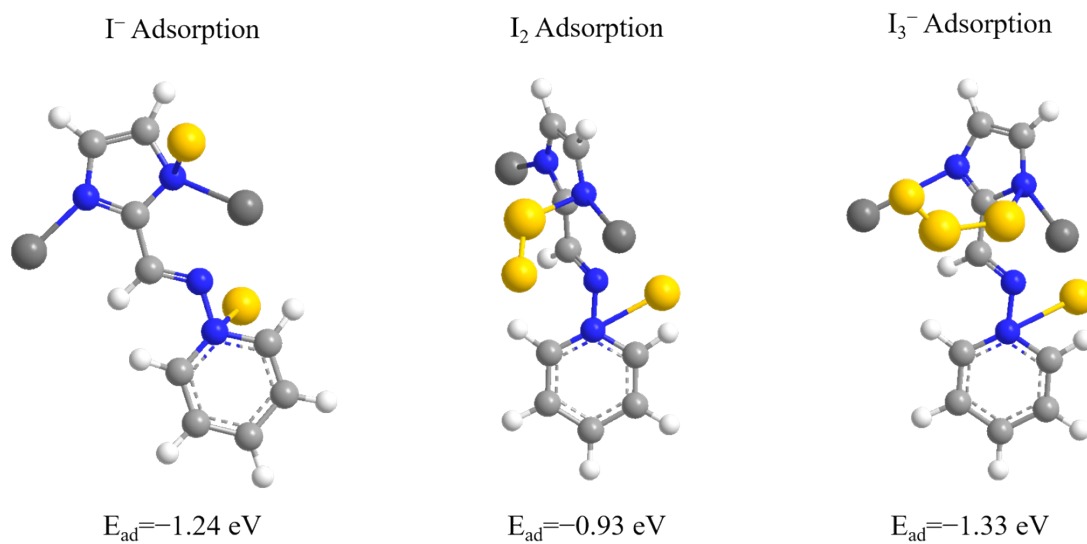

**Figure S20.** The proposed adsorption model of B-site N for iodine species and calculated adsorption energies.

### C-site N adsorb iodine species

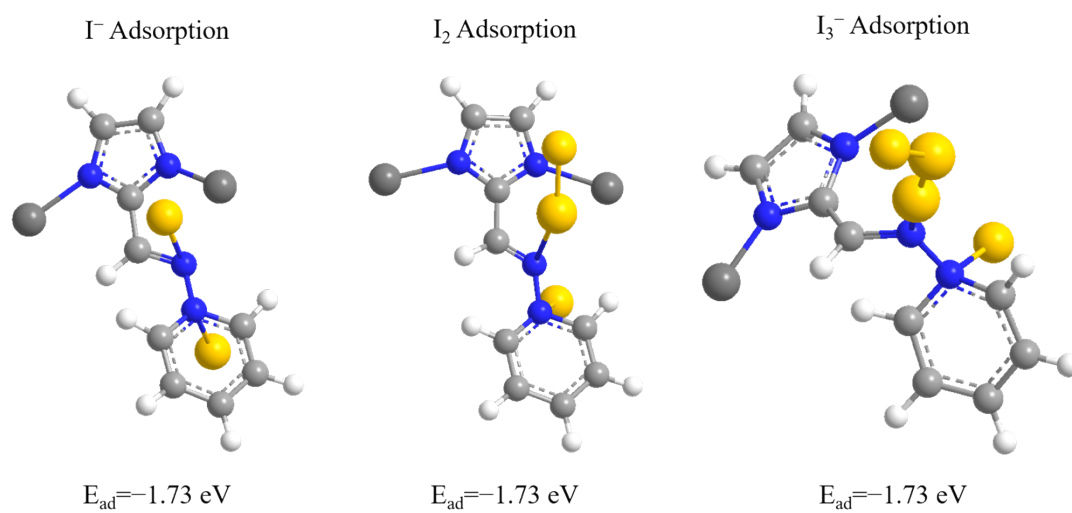

**Figure S21.** The proposed adsorption model of C-site N for iodine species and calculated adsorption energies.

### D-site N adsorb iodine species

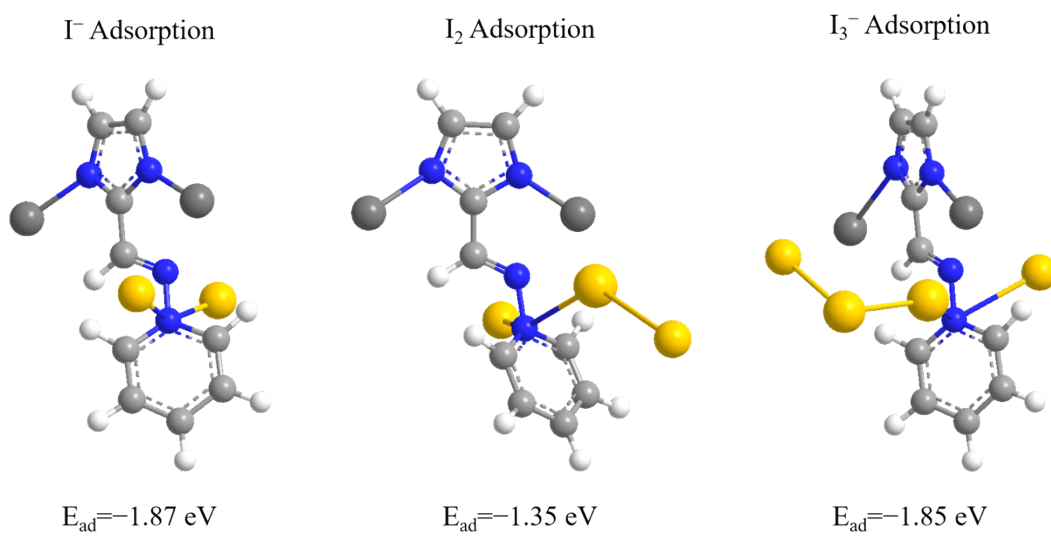

**Figure S22.** The proposed adsorption model of D-site N for iodine species and calculated adsorption energies.

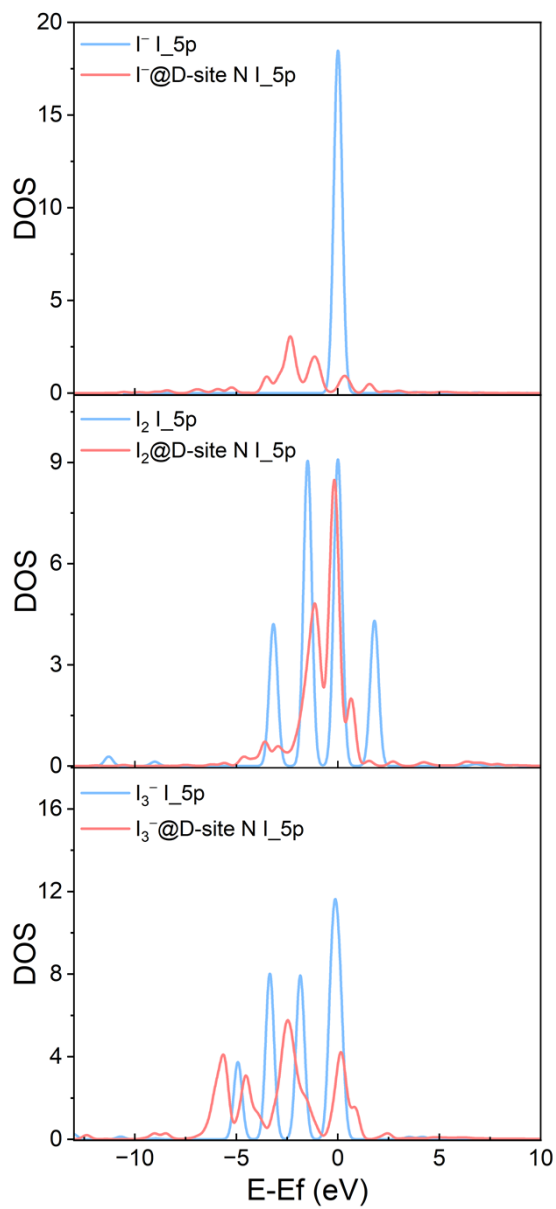

**Figure S23.** Partial density of the states (PDOS) for I 5p orbital of various iodine species ( $I^-$ ,  $I_2$ , and  $I_3^-$ ) before and after adsorption on D-site N.

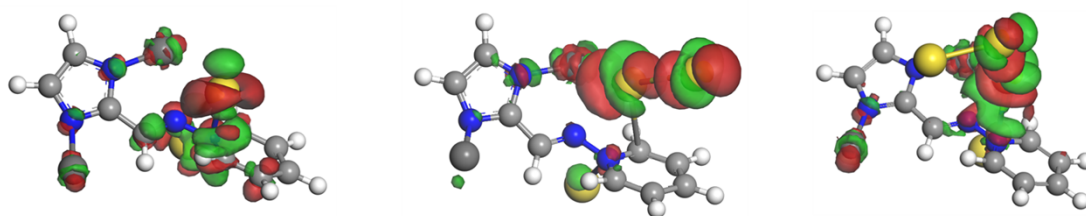

**Figure S24.** Optimized charge-density-difference patterns of  $I^-$ ,  $I_2$ , and  $I_3^-$  on D-site

N.

## References

- [1] H. Yang, Y. Qiao, Z. Chang, H. Deng, P. He and H. Zhou, *Adv. Mater.*, 2020, **32**, 2004240.
- [2] X. Li, N. Li, Z. Huang, Z. Chen, G. Liang, Q. Yang, M. Li, Y. Zhao, L. Ma, B. Dong, Q. Huang, J. Fan, C. Zhi, *Adv. Mater.* **2021**, 33, 2006897.
- [3] L. Zhang, J. Huang, H. Guo, L. Ge, Z. Tian, M. Zhang, J. Wang, G. He, T. Liu, J. Hofkens, D. J. L. Brett and F. Lai, *Adv. Energy Mater.*, 2023, **13**, 2203790.
- [4] W. Shang, Q. Li, F. Jiang, B. Huang, J. Song, S. Yun, X. Liu, H. Kimura, J. Liu and L. Kang, *Nanomicro Lett.*, 2022, **14**, 82.
- [5] Y. Tan, Z. Chen, Z. Tao, A. Wang, S. Lai and Y. Yang, *Angew. Chem. Int. Ed.*, 2023, **62**, e202217744.
- [6] L. Ma, Y. Ying, S. Chen, Z. Huang, X. Li, H. Huang and C. Zhi, *Angew. Chem. Int. Ed.*, 2021, **60**, 3791-3798.
- [7] H. Peng, Y. Fang, J. Wang, P. Ruan, Y. Tang, B. Lu, X. Cao, S. Liang and J. Zhou, *Matter*, 2022, **5**, 4363-4378.
- [8] X. Li, S. Wang, T. Wang, Z. Duan, Z. Huang, G. Liang, J. Fan, C. Yang, A. L. Rogach and C. Zhi, *Nano Energy*, 2022, **98**, 107278.
